# Supplementary material for: Cooperative activation of Xenopus rhodopsin transcription by paired-like transcription factors
Source: PubMed Central journal article supplement (PMC3937059; doi:10.1186/1471-2199-15-4), 2014-02-06
Supplement: 1471-2199-15-4-S7.pdf [file 1471-2199-15-4-S7.pdf]

# CLUSTALW multiple sequence alignment

```

Felis      ---CCCTCTTGGGAAGCCAATTAGGC--CCCCAGTTGCAGTAGTGGGGATTAGTATGATTA 55
Dolphin   ---CCCTCTTGGGAAGCCAATTAGGC--CCCCAGTTGCAGCAGTGAGGATTAATATGATTA 55
Canis      ---CACTCTTGGGAAGCCAATTAGGC--CCCTAGTTGCGGCAGTGGGGATTATATGATTA 55
Chim       -GCCCTCTTGGGAAGCCAATTAGGC--CCTCAGTTTCTGCAGCGGGGATTAATATGATTA 57
Gorilla    -GCCCTCTTGGGAAGCCAATTAGGC--CCTCAGTTTCTGCAGCGGGGATTAATATGATTA 57
Orangutan  -GCCCTCTTGGGAAGCCAATTAGGC--CCTCAGTTTCTGCAGCGGGGATTAATATGATTA 57
Human      --CCCCCTCTAGAAGCCAATTAGGC--CCTCAGTTTCTGCAGCGGGGATTAATATGATTA 56
Macaque    -GCCCTCTTGGGAAGCCAATTAGGC--CCTCAGTTTCTGCAGCGGG-ATTAATATGATTA 56
Marmoset   -GGACCTCTGGGAAGCCAATTAGGC--CCTCCATTTCTGCAGCGGGGATTAATATGATTA 57
Bushbaby   GGCCCCCTCTTAGAAGCCAATTAGGT--CCCCAGTAGCTGTGGTGGGGATTAATATGATTA 58
Mouse      --GCCCTCTGCAAGCCAATTAGG---CCCCGGTGGCAGCAGT--GGGATTAGCGTTAGTA 54
Rat        -GGCCCCCTCTGCAAGCTAATTAGG---CCCCAGTGGCAGCAGT--GGGATTAGTATTAGTG 55
Tree       -CGTCACCCGGGAAGCCAATTAG---CCCCGGTGCAGCGGTGGGGATTATTATGATTC 55
GuineaPig -TGTCCCCCACAAGCCAATTAG---GCCCTGTGGCAGTGT--GGGATTAGTATGATTA 53
Kangara    -GGCGCTCTGCAAGCCAATTAGGCC-CCCCGGCAGCAGCGGTGGAGATTAGTATGATTA 58
Hedgehog   -GGCCCCCTTGGGCACTAATTAGG---CCCCAGCAGCCCT---GGGATTACCGCAATCA 52
Pika       -GCCCTCTCAGAAGCCAATTAGGCC-CCGCACTTGCTACCATGGGGATTAATATGATTA 58
Rabbit     -GCCCTTTTGGGAAGCCAATTAGGCC-CC-TAGTTGCAGCCATGGGGATTAATATGATTA 57
Horse      GGCCCCCTCACGAAGCCAATTAGG---CCCCAGTTACAGCAGCGGTGATTAATATGATTA 57
Elephant   GGCCCCCTTGGGAAGCCAATTAGG---TCCAGTTGCAA--GTGGTATTAGTATGATTA 55
Pig        -GCCCTCTTGGGAAGCCAATTAGG---CCCCAGTTGCAGCCGTGGGGATTAATATGATTA 56
Bos        --CCCCACCTGGGAAGCCAATTAAGC--CCCTCGTTGCAGCAGTGAGGATTAATATGATTA 56
Alpaca     --CCCCCTCTGGGAAGCCAATTAGGC--CCCTGGTTGCGGCAGTGGGGATTAATATGATTA 56
Tenre      -GCCACTGTGGGAAGCCAATTAGC---CTTTGGTTGCAG--GTGAGGATTAAGATCATT 54
Megabat    --CTTCTTGGGAAGCCAATTAGGCC-CCCAGTTGGCAGCATCAGGGATTAATATGATTA 57
Wallaby    TGCCCTCCAGGGAAGCCAATTAG---TGCTTGCCAACCTAGCTGG-ATTATTATGATTA 55
Opposum    -GCCTTCTTGGGAAGCCAATTA---TGCTTGCCAACCTAGCGGGGATTATTATGATTA 55
X.laervis  --CGTTTAAGGGAAGCCAATTAACA---CTTTGCAATTTAGCTTGGATTACAGTGATTA 55
X.trop     --CGTTTATGAGAAGCCAATTAACAC---TTTGCACCTTAGCTTGGATTACAATGATTA 55
Platypus   --CTGCTCTGGGAAGCCAATTAGCAAGCGCTTGCAAACCCAGTGTGGATTATTACGATTA 58

```

```

Felis      ATAATGCCCCAATCTTCCAGGTGCTGATTC---AGCCAGGAGCTTAGGGAG--GGGAG 109
Dolphin   ATAACGCCCCAATCTCGCAGGTGCTGATTC---AGCCAGGAGCTTAGGGAG--GGGAG 109
Canis      ATAACGCCCCAATCTCCAGGTGCTGATTC---AGCCAGGAGCTTAGGGAG--GGGAG 109
Chim       TGAACACCCCCAATCTCCAGATGCTGATTC---AGCCAGGAGCTTAGGAGG--GGGAG 111
Gorilla    TGAACACCCCCAATCTCCAGATGCTGATTC---AGCCAGGAGCTTAGGAGG--GGGAG 111
Orangutan  TGAACACCCCCAATCTCCAGATGCTGATTC---AGCCAGGAGCTTAGGAGG--GGGAG 111
Human      TGAACACCCCCAATCTCCAGATGCTGATTC---AGCCAGGAGCTTAGGAGG--GGGAG 110
Macaque    TGAACACCCCCAATCTCCAGATGCTGATTC---AGCCAGGAGCTTAGGAGG--GGGAG 110
Marmoset   TGAACACCCC--AATCTCTCAGATGCTGATTC---AGCCAGGAGCTTAGGAGG--GGGAG 110
Bushbaby   TGA-CACCCC--AATCTCCAGATGCTGATTC---AGCCAAGAGCTTAGGGAG--GGGAG 110
Mouse      TGAT-----ATCTCGCGGATGCTGAATC---AGCCTCTGGCTTAG-GGA-GAGAAG 100
Rat        TGAT-----ATCTCCCGGATGCTGAATC---AGCCTCTGGCTTAG-AGA-GAGAAG 101
Tree       CGAGCTCTG-GATCGCCCGGTGCCGAGTC---AGCA--GGCCTTAG-GGA-TAGA-G 105
GuineaPig TGCGCC-----GATCTCCCGCAGGCTGAGTC---AGCG--CAGCTTAG-GCC-CAGAAG 100
Kangara    TGAGCACCCC-GATCTCCCGGTGCTGATTC---AGCCAGGGGCTTAGAGGG--GGGAG 112
Hedgehog   CCCC-----AATCTGCGGGTCTGAGTC---AGGC--AGGTTTAG-----CAGGAG 94
Pika       TGATAACCCCCAACTCCCGGTGCTGACTC---AGCTGAGAGCTTAGGGCG--GGAG 112
Rabbit     TGATCACCCCCAATCTCCCGGTGCTGACTC---AACCAGGAGCTTAGGGGAGGGAG 113
Horse      ATAACGCCCCAATCTCCAGGTGCTGATTC---AGCCAGGAGCTTAGGGAG--GGGAG 111
Elephant   ATAACGCCCCAATCTCCAGGTGCTGATTC---AGCCAGGAGCTTAGGGAG--GGGAG 109
Pig        ATAACGCCCCAATCTCCAGGTGCTGATTC---AGCCAGGAGCTTAGGGAG--GGGAG 110
Bos        ATAACGCCCCAATCTCCAGGTGCTGATTC---AGCCAGGAGCTTAGGGAG--GGGAG 110
Alpaca     ATAATGCCCCAATCGCCAGGTGCTGATTC---AGCCAGGAGCTTAGGGAG--GGGAG 110

```

|           |                                                              |     |
|-----------|--------------------------------------------------------------|-----|
| Tenre     | ATATCGCCCCAATCTCCAGGTGCTGATTC----AGTCAGAAGCTTAGGGAG---GGAG   | 107 |
| Megabat   | ATAACGCCCCAATCTCCAGGTGCTGATTC----AGCCAGGAGCTTAGGGAG--GGGAG   | 111 |
| Wallaby   | ATTATGCCCTGAATCTTCTGGGTGCTGACTCCATAGAAGGAGGGCTTACCCAG--AGGGG | 113 |
| Opposum   | GTCATGCCCTGAATCTTCTGGGTGCTGACACTAGGGAAGGAGGGCTTACCCAT--AGGGG | 113 |
| X.laervis | ATAGTGGCTAAATCCTTT-GTTGCTGACGCTGGGGGTTGCAAGCTTACTCCA----GGT  | 110 |
| X.trop    | TTAGTGGCTAAATCCTTTGTT-GCTGACGCTGGGGGTTGGCAGCTTACTTCA----GGT  | 110 |
| Platypus  | ATAATGCCCCGATCCCTGTTTGCTGACACCAGCCCCCTCCAGCTTAGCTGAA----GGT  | 114 |

|           |                                     |     |
|-----------|-------------------------------------|-----|
| Felis     | GTCAC TTATAAGGGCCTGGGGGGG-----      | 134 |
| Dolphin   | GTCAC TTATAAGGGCCTGGGGGGG-----      | 134 |
| Canis     | GTCAC TTATAAGGGCCTGGGGGGG-----      | 134 |
| Chim      | GTCAC TTATAAGGGTCTGGGGG-----        | 134 |
| Gorilla   | GTCAC TTATAAGGGTCTGGGGG-----        | 134 |
| Orangutan | GTCAC TTATAAGGGTCTGGGGG-----        | 134 |
| Human     | GTCAC TTATAAGGGTCTGGGGGG-----       | 134 |
| Macaque   | GTCAC TTATAAGGGTCTGGGGGG-----       | 134 |
| Marmoset  | GTCAC TTATAAGGGTCTGTGGGG-----       | 134 |
| Bushbaby  | GTCAC TTATAAGGGTCTGGGGGG-----       | 134 |
| Mouse     | GTCAC TTATAAGGGTCTGGGGGGGGTCAGTGCC  | 134 |
| Rat       | GTCAC TTATAAGGGTCTGGGGGGGGTC-----   | 129 |
| Tree      | GTCAC TTAATAAGGGCCTGGGGGGGGTGG----- | 134 |
| GuineaPig | GTCAC TTCATAAGGGCCTGGGGGGGCCAGGGCCA | 134 |
| Kangara   | GTCAC TTATAAGGGTCTGGGG-----         | 134 |
| Hedgehog  | GTCGCTTCATAAGGCCCTGGGGGGGGTCCC----- | 124 |
| Pika      | GTCAC TTATAAGGGTCTGGG-----          | 134 |
| Rabbit    | GTCAC TTATAAGGGTCTGGG-----          | 134 |
| Horse     | GTCAC TTATAAGGCCCTGGGG-----         | 134 |
| Elephant  | GTCAC TTATAAGGGCTGGGGGG-----        | 134 |
| Pig       | GTCAC TTATAATGGCCTGGGG-----         | 134 |
| Bos       | GTCAC TTCATAAGGGCCTGGGG-----        | 134 |
| Alpaca    | GTCAC TTCATAAGGGCCTGGGG-----        | 134 |
| Tenre     | GTCA-TTTATAAGGGTCTGGCGTGGGG-----    | 134 |
| Megabat   | GTCAC TTATAAGGGCCTGGGG-----         | 134 |
| Wallaby   | GTCAC TTATAAGGACCTCAA-----          | 134 |
| Opposum   | GTCAC TTATAAGGACCTCAA-----          | 134 |
| X.laervis | GGGACTTTAAAAGGACGAGGGGAC-----       | 134 |
| X.trop    | GGGACTTTAAAAGGACCCGGGGAC-----       | 134 |
| Platypus  | TTGCCTCATAAAGGCTGCAG-----           | 134 |

## References

- (1) <http://www.ebi.ac.uk/Tools/clustalw2/>
- (2) <http://weblogo.threeplusone.com/>
- (3) Crooks GE, Hon G, Chandonia JM, Brenner SE WebLogo: A sequence logo generator, *Genome Research*, 14:1188-1190, (2004)
