# Supplementary material for: Cooperative activation of Xenopus rhodopsin transcription by paired-like transcription factors
Source: PubMed Central journal article supplement (PMC3937059; doi:10.1186/1471-2199-15-4), 2014-02-06
Supplement: 1471-2199-15-4-S8.pdf [file 1471-2199-15-4-S8.pdf]

**Table 1** Sequences used in alignment of tetrapod rhodopsin promoters

| <b>Species</b>                                      | <b>Ensembl Accession Number</b> |
|-----------------------------------------------------|---------------------------------|
| Alpaca ( <i>Vicugna pacos</i> )                     | ENSVPAG00000003334              |
| Anole Lizard ( <i>Anolis carolinensis</i> )         | ENSACAG00000014258              |
| Armadillo ( <i>Dasypus novemcinctus</i> )           | ENSDNOG00000015133              |
| Bushbaby ( <i>Otolemur garnettii</i> )              | ENSOGAG00000010259              |
| Cat ( <i>Felis catus</i> )                          | ENSFCAG0000000092               |
| Chicken ( <i>Gallus gallus</i> )                    | D00702 (GenBank)                |
| Chimpanzee ( <i>Pan troglodytes</i> )               | ENSPTRG00000015379              |
| Cow ( <i>Bos taurus</i> )                           | ENSBTAG00000001310              |
| Dog ( <i>Canis familiaris</i> )                     | ENSCAFG00000004633              |
| Dolphin ( <i>Tursiops truncatus</i> )               | ENSTTRG00000011273              |
| Elephant ( <i>Loxodonta africana</i> )              | ENSLAFG00000001359              |
| Rhodopsin 7 Fugu ( <i>Takifugu rubripes</i> )       | ENSTRUG00000004527              |
| Gorilla ( <i>Gorilla gorilla</i> )                  | ENSGGOG00000010728              |
| Guinea Pig ( <i>Cavia porcellus</i> )               | ENSCPOG00000004984              |
| Hedgehog ( <i>Erinaceus europaeus</i> )             | ENSEEUG00000008285              |
| Horse ( <i>Equus caballus</i> )                     | ENSECAG000000013709             |
| Hyrax ( <i>Procavia capensis</i> )                  | ENSPCAG000000013147             |
| Kangaroo rat ( <i>Dipodomys ordii</i> )             | ENSDORG00000000911              |
| Lesser hedgehog tenrec ( <i>Echinops telfairi</i> ) | ENSETEG00000000282              |
| Macaque ( <i>Macaca mulatta</i> )                   | ENSMMUG000000012734             |
| Marmoset ( <i>Callithrix jacchus</i> )              | ENSCJAG000000017195             |
| Medaka ( <i>Oryzias latipes</i> )                   | ENSORLG000000010599             |
| Megabat ( <i>Pteropus vampyrus</i> )                | ENSPVAG00000007112              |
| Microbat ( <i>Myotis lucifugus</i> )                | ENSMLUG000000014786             |
| Mouse ( <i>Mus musculus</i> )                       | ENSMUSG000000030324             |
| Mouse Lemur ( <i>Microcebus murinus</i> )           | ENSMICG000000008063             |
| Opossum ( <i>Monodelphis domestica</i> )            | ENSMODG000000006488             |
| Orangutan ( <i>Pongo pygmaeus</i> )                 | ENSPPYG000000013415             |
| Pig ( <i>Sus scrofa</i> )                           | ENSSSCG000000011590             |
| Pika ( <i>Ochotona princeps</i> )                   | ENSOPRG000000011547             |
| Platypus ( <i>Ornithorhynchus anatinus</i> )        | ENSOANG000000003778             |
| Rabbit ( <i>Oryctolagus cuniculus</i> )             | ENSOCUG000000013036             |
| Rat ( <i>Rattus norvegicus</i> )                    | ENSRNOG000000011144             |
| Squirrel ( <i>Spermophilus tridecemlineatus</i> )   | ENSSTOG00000004402              |
| Tetraodon ( <i>Tetraodon nigroviridis</i> )         | ENSTNIG000000017909             |
| Tree Shrew ( <i>Tupaia belangeri</i> )              | ENSTBEG000000011354             |
| Turkey ( <i>Meleagris gallopavo</i> )               | ENSMGAG000000010301             |
| Wallaby ( <i>Macropus eugenii</i> )                 | ENSMEUG00000007196              |
