# Supplementary material for: Cooperative activation of Xenopus rhodopsin transcription by paired-like transcription factors
Source: PubMed Central journal article supplement (PMC3937059; doi:10.1186/1471-2199-15-4), 2014-02-06
Supplement: 1471-2199-15-4-S9.pdf [file 1471-2199-15-4-S9.pdf]

| PCR product/construct   | sense primer (5'-3')                               | antisense primer (5'-3')                            |
|-------------------------|----------------------------------------------------|-----------------------------------------------------|
| Histone H4              | CGGGATAACATTTCAGGGTATCACT                          | ATCCATGGCGGTAAGTGTCTTCCT                            |
| Rax1a                   | CATATGAATACGGCTCAGGGC                              | AAATAAGGGTTTCGCCTGGC                                |
| Rax1b                   | GGGAGGACATTCTAACAAATCAGTGGAC                       | CCCTGACCTAGAGAGAGTACAGAGACC                         |
| Rax2a                   | AGCTTTTACGAAACGCTATACCTCAAC                        | AATACTGATTTACCAGACCCAATGAAG                         |
| Rax2b                   | GGCAGCCTATCTGATGAAAACAGC                           | CTGACCCAGTGAAGACACAGTGAAG                           |
| pCS2-Rax1a              | <u>GAATTC</u> AACACCTCAAGGGTCCTCAATG               | <u>CTCGAG</u> CATATGTTTTACCAAGGCTTGCC               |
| pCS2-Rax1b              | <u>GAATTC</u> TCAATGCACCTGCACAGTCCTCC              | <u>CTCGAG</u> CTGTGCCGTATTCATATGGTTTGCC             |
| pCS2-Rax2a              | <u>GAATTC</u> GCAGCTAAGTGCAGTTCAGG                 | <u>CTCGAG</u> TCAGATTGGCTGCCATG                     |
| pCS2-Rax2b              | <u>GAATTC</u> AACAAGAACCAGCGTACCCAAG               | <u>CTCGAG</u> ATCAGATAGGCTGCCATGTTTTATC             |
| Rax1a                   | GAGGCCATCTTGGGGTTTGTGAA                            | GGATGAATCTCCTCGGTCATTTTGTG                          |
| Rax1b                   | GAGGCCATCTTAGGGTTTGCCAA                            | GATGAATCTCCTCCGTCATTTTGTGG                          |
| Rax2a                   | AATACTGATTTACCAGACCCAATGAAG                        | AGCTTTTACGAAACGCTATACCTCAAC                         |
| Rax2b                   | GGCAGCCTATCTGATGAAAACAGC                           | CTGACCCAGTGAAGACACAGTGAAG                           |
| ΔRetBat1                | AACTGCAGTAGTGCCTAAATCCTTTG                         | AACTGCAGCCCTTAAACGTATTAAGTCTACAC                    |
| m1, m5, m7, m9, m10     | CCAAAAGCTTTAAGCCAAGGAACACTCTATT                    | TTGGAATAGAGTGTTCCTTGGCTTAAAGCTT                     |
| m2, m5                  | CCAAAAGCTTTTGGAGGACAGTGCTATT                       | TTGGAATAGCACTGTCCCTCCAAAAGCTT                       |
| m3                      | GCAATTTTAGCTTGGATTACAGTGAGGAATAGTGCCTAAATCCTTTGTTG | CAACAAAGGATTTAGCGCACTATTCCTCACTGTAATCCAAGCTAAAATTGC |
| m4, m7, m9, m10         | CCAAAAGCTTTCAAGCGGACTCCAGGCTATT                    | TTGGAATAGCCTGGAGTCCGCTTGAAAGCTT                     |
| m6, m8, m9, m10         | CCAAAAGCTTTTGGAGGACAGTGAGGAACTATT                  | TTGGAATAGTTCTCACTGTCCCTCCAAAAGCTT                   |
| 503 UP                  | <u>CCCGGG</u> CCACCACAGATGTCAAACGGACTG             | <u>ACGCGT</u> GAGCTGCTACCATGAACGGAACAGA             |
| 503 UP                  | <u>GCTAGC</u> GGCCATGCGGTCCTAACGTCT                | <u>AGATCT</u> GATCCCTAGAAGCCTGTGATCCCAAC            |
| FRT-Hygroycin construct | <u>GGATCC</u> GATTAGGGTGTGGTTCACGTACCTAGAAGT       | <u>GTCGAC</u> TTTACACTTATGCTTCCGGCTCGTATGT          |
